# Supplementary material for: Responses of leaf traits to climatic gradients: adaptive variation versus compositional shifts
Source: Copernicus journal article supplement (doi:10.5194/bg-12-5339-2015), 2015-09-17
Supplement: Supplementary file 1 [file bg-12-5339-2015-supplement.pdf]

Supplement of Biogeosciences, 12, 5339–5352, 2015  
<http://www.biogeosciences.net/12/5339/2015/>  
doi:10.5194/bg-12-5339-2015-supplement  
© Author(s) 2015. CC Attribution 3.0 License.

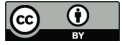

*Supplement of*

## **Responses of leaf traits to climatic gradients: adaptive variation versus compositional shifts**

**T.-T. Meng et al.**

*Correspondence to:* H. Wang (wanghan\_sci@yahoo.com)

The copyright of individual parts of the supplement might differ from the CC-BY 3.0 licence.

## Supplement

Figure S1: Partial residual plots for the relationships between leaf traits and the Cramer-Prentice moisture index ( $\alpha$ ), from a GLM analysis with PFT identity included as a predictor. Each point represents a species-site combination; fitted lines for each PFT are indicated by colours.

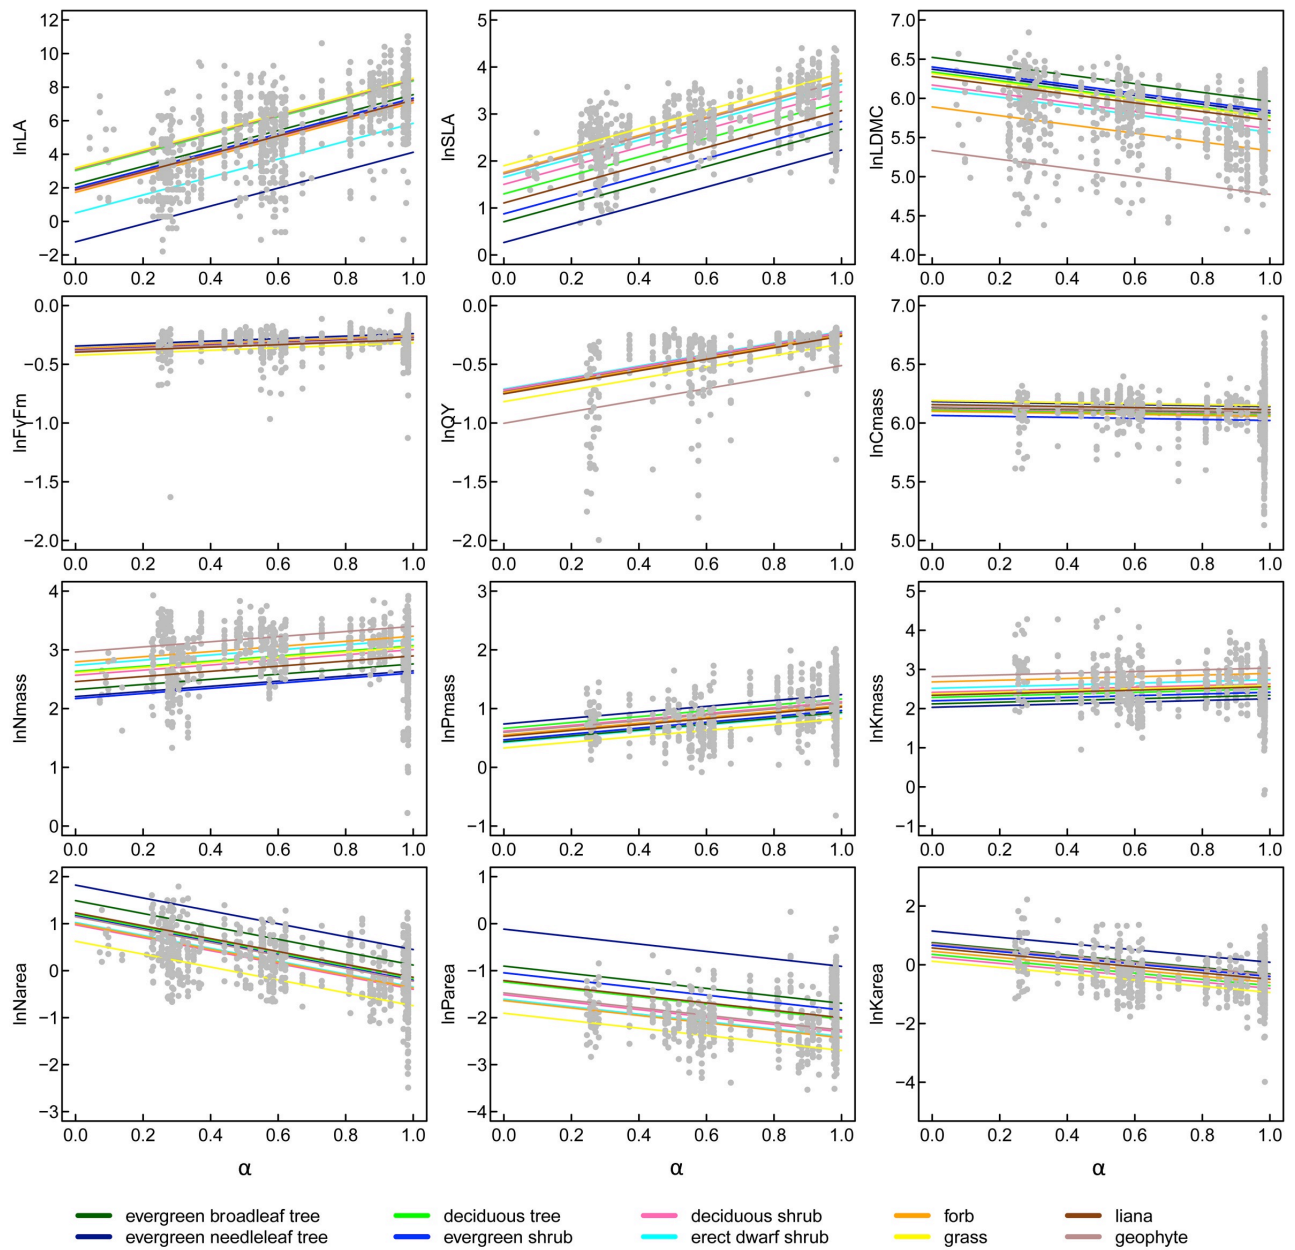

Figure S2: Partial residual plots for the relationships between leaf traits and the Cramer-Prentice moisture index ( $\alpha$ ), from a GLM analysis with PFT  $\times$  climate interactions included as predictors. Each point represents a species-site combination; fitted lines for each PFT are indicated by colours. Only significant PFT  $\times$  climate interactions ( $P < 0.01$ ) are shown.

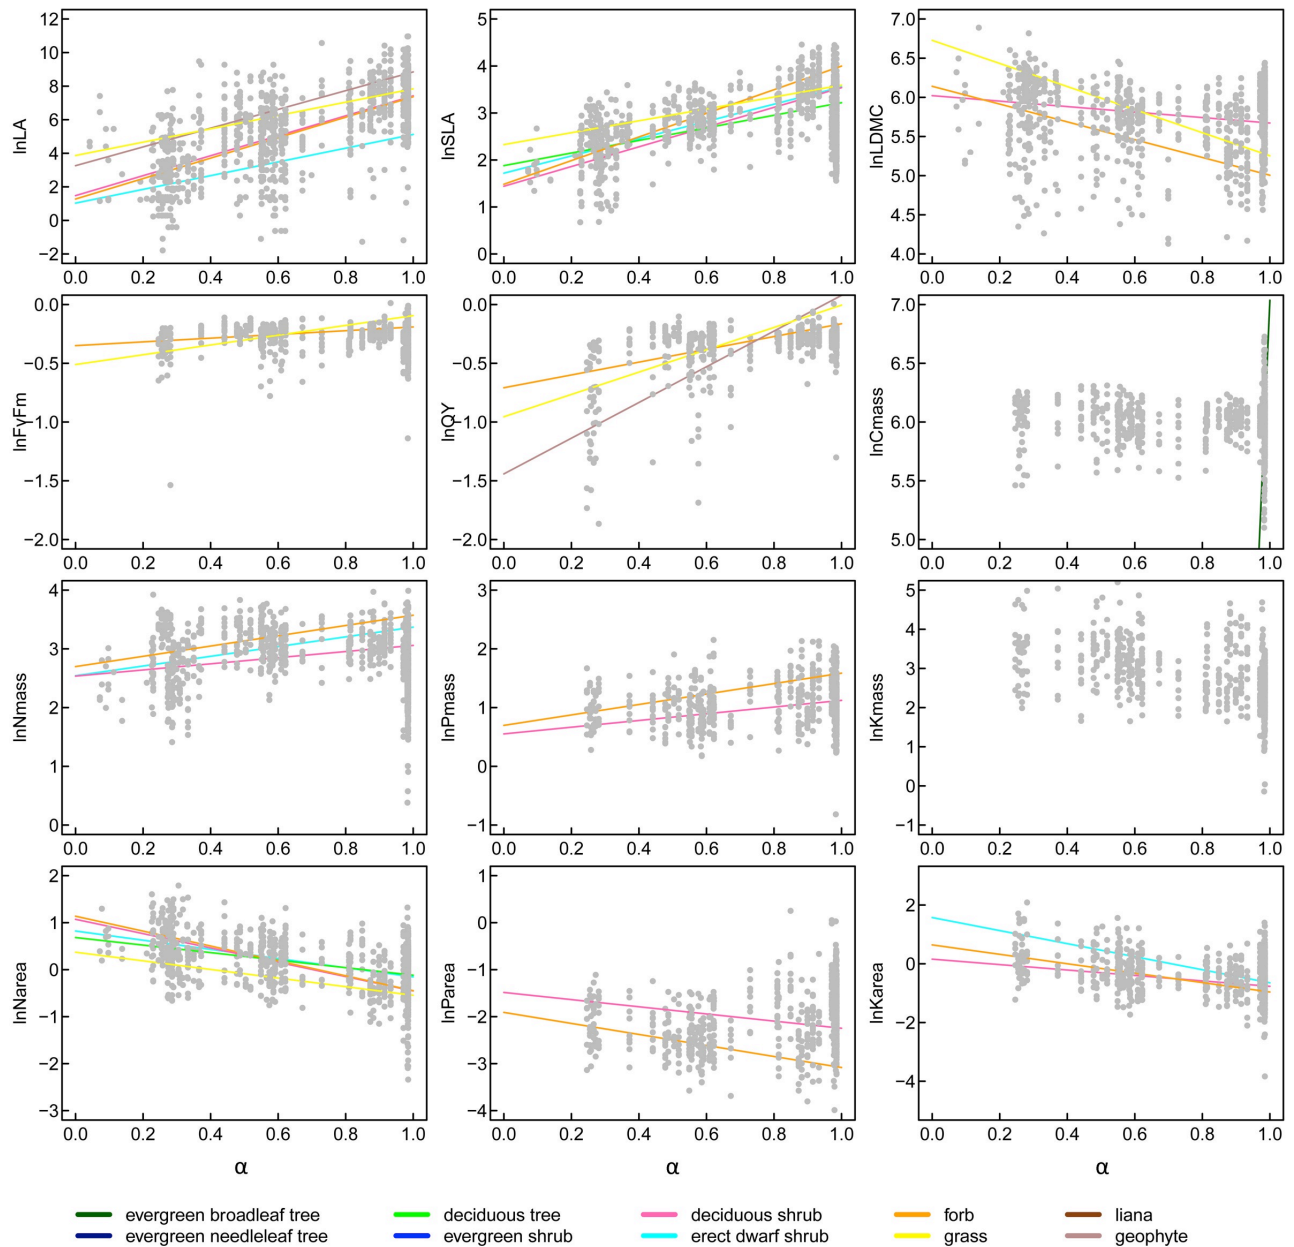

Figure S3: Partial residual plots for the relationships between leaf traits and growing degree days ( $GDD_0$ ), from a GLM analysis with PFT identity included as a predictor. Each point represents a species-site combination; fitted lines for each PFT are indicated by colours.

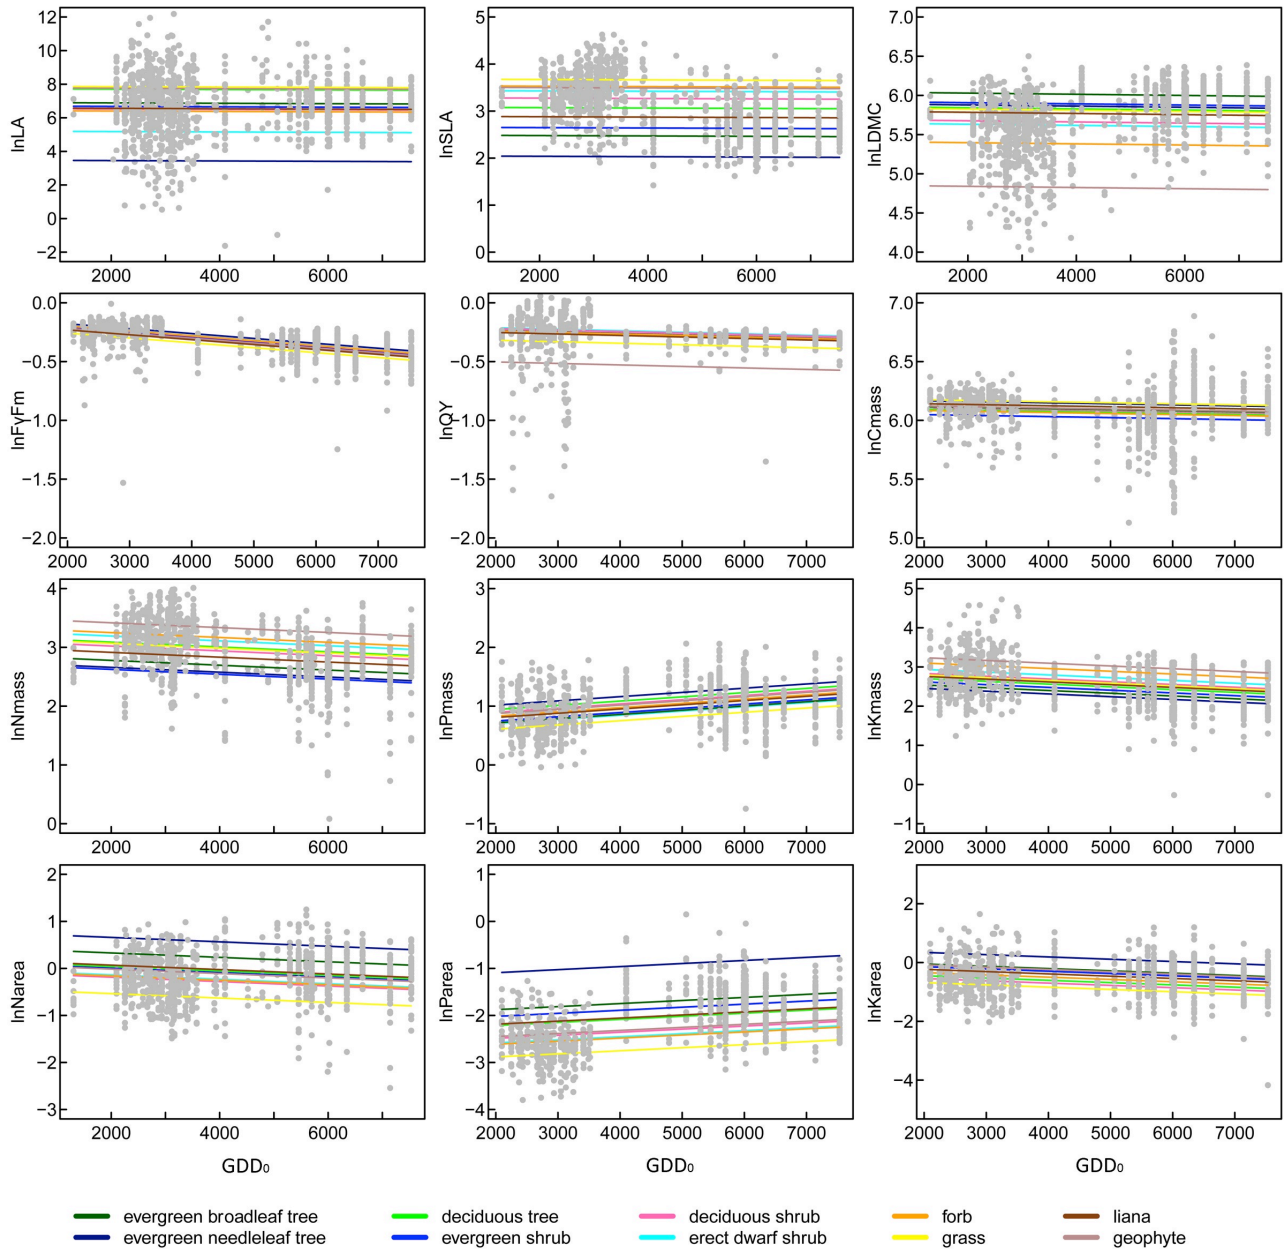

Figure S4: Partial residual plots for the relationships between leaf traits and growing degree days ( $GDD_0$ ), from a GLM analysis with PFT  $\times$  climate interactions included as predictors. Each point represents a species-site combination; fitted lines for each PFT are indicated by colours. Only significant PFT  $\times$  climate interactions ( $P < 0.01$ ) are shown.

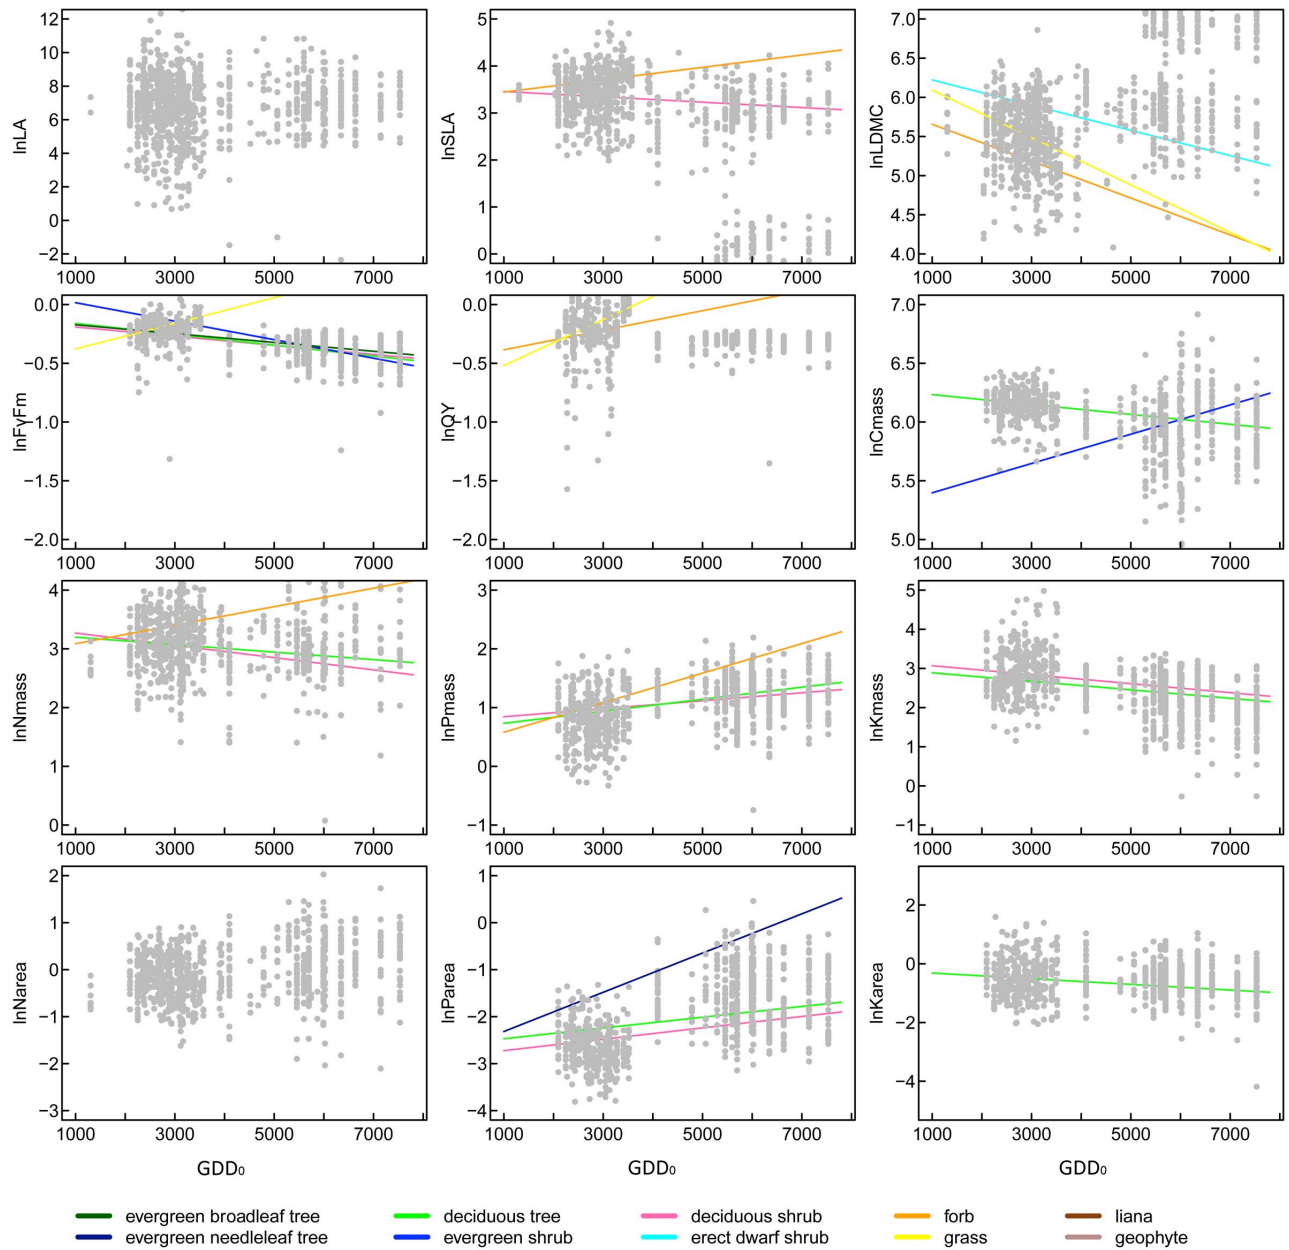

Table S1: Characteristics of sampling sites

| site code | latitude<br>(°N) | longitude<br>(°E) | elevation<br>(m) | vegetation type                                          | number<br>of<br>species | GDD <sub>0</sub><br>(day °C) | $\alpha$ |
|-----------|------------------|-------------------|------------------|----------------------------------------------------------|-------------------------|------------------------------|----------|
| NECT01    | 42.88            | 118.48            | 1024             | steppe                                                   | 19                      | 2433.20                      | 0.67     |
| NECT02    | 43.64            | 119.02            | 781              | steppe                                                   | 43                      | 3047.57                      | 0.55     |
| NECT03    | 43.02            | 129.78            | 136              | deciduous broad-<br>leaved forest                        | 24                      | 2727.77                      | 0.90     |
| NECT04    | 42.98            | 130.08            | 114              | evergreen<br>conifer/deciduous<br>broad-leaved<br>forest | 26                      | 2870.71                      | 0.88     |
| NECT05    | 43.30            | 131.15            | 289              | deciduous<br>conifer/deciduous<br>broad-leaved<br>forest | 42                      | 2391.45                      | 0.92     |
| NECT06    | 43.12            | 131.00            | 244              | evergreen<br>conifer/deciduous<br>broad-leaved<br>forest | 49                      | 2097.04                      | 0.98     |
| NECT07    | 43.39            | 129.67            | 224              | deciduous<br>conifer/deciduous<br>broad-leaved<br>forest | 40                      | 2760.26                      | 0.87     |
| NECT08    | 43.25            | 128.64            | 601              | evergreen<br>conifer/deciduous<br>broad-leaved<br>forest | 39                      | 2702.15                      | 0.93     |
| NECT09    | 43.73            | 127.03            | 390              | evergreen<br>conifer/deciduous<br>broad-leaved<br>forest | 55                      | 2935.09                      | 0.98     |
| NECT10    | 43.81            | 125.68            | 252              | evergreen<br>conifer/deciduous<br>broad-leaved<br>forest | 40                      | 3278.10                      | 0.81     |
| NECT11    | 44.59            | 123.51            | 146              | meadow steppe                                            | 19                      | 3412.10                      | 0.58     |
| NECT12    | 44.43            | 123.27            | 150              | meadow steppe                                            | 18                      | 3407.62                      | 0.57     |
| NECT13    | 43.60            | 121.84            | 203              | meadow steppe                                            | 20                      | 3515.92                      | 0.49     |
| NECT14    | 44.12            | 121.77            | 202              | meadow steppe                                            | 7                       | 3490.75                      | 0.50     |
| NECT15    | 44.39            | 120.55            | 448              | steppe                                                   | 21                      | 3047.41                      | 0.59     |
| NECT16    | 44.22            | 120.37            | 372              | steppe                                                   | 18                      | 3248.01                      | 0.55     |
| NECT17    | 43.88            | 119.38            | 601              | steppe                                                   | 15                      | 2683.63                      | 0.62     |
| NECT18    | 43.76            | 119.12            | 729              | steppe                                                   | 23                      | 2816.77                      | 0.59     |
| NECT19    | 43.34            | 118.49            | 707              | steppe                                                   | 12                      | 2646.25                      | 0.61     |
| NECT20    | 43.19            | 117.76            | 889              | steppe                                                   | 23                      | 2583.25                      | 0.62     |
| NECT21    | 43.22            | 117.24            | 1259             | steppe                                                   | 23                      | 2248.48                      | 0.61     |
| NECT22    | 43.39            | 116.89            | 1267             | steppe                                                   | 13                      | 2274.88                      | 0.58     |

|         |       |        |      |                                             |    |         |      |
|---------|-------|--------|------|---------------------------------------------|----|---------|------|
| NECT23  | 43.55 | 116.68 | 1261 | steppe                                      | 22 | 2410.95 | 0.56 |
| NECT24  | 43.69 | 116.64 | 1211 | steppe                                      | 20 | 2374.09 | 0.52 |
| NECT25  | 43.91 | 116.31 | 1199 | steppe                                      | 24 | 2666.32 | 0.48 |
| NECT26  | 43.90 | 115.32 | 1196 | steppe                                      | 27 | 2509.65 | 0.44 |
| NECT27  | 43.94 | 114.61 | 1123 | desert steppe                               | 19 | 2716.00 | 0.37 |
| NECT28  | 43.83 | 113.83 | 1166 | desert steppe                               | 14 | 2895.45 | 0.28 |
| NECT29  | 43.80 | 113.36 | 1017 | desert steppe                               | 11 | 3104.24 | 0.25 |
| NECT30  | 43.72 | 112.59 | 974  | desert steppe                               | 21 | 3103.83 | 0.27 |
| NECT31  | 43.63 | 112.17 | 999  | desert steppe                               | 16 | 3164.51 | 0.26 |
| NECT32  | 43.66 | 111.92 | 1005 | desert steppe                               | 15 | 3127.61 | 0.26 |
| NECT33  | 43.65 | 111.89 | 1017 | desert steppe                               | 16 | 3129.06 | 0.27 |
| NSTEC01 | 36.24 | 117.02 | 368  | conifer/deciduous<br>broad-leaved<br>forest | 9  | 4787.79 | 0.73 |
| NSTEC02 | 34.64 | 119.24 | 59   | conifer/deciduous<br>broad-leaved<br>forest | 13 | 5063.76 | 0.85 |
| NSTEC03 | 32.05 | 118.86 | 76   | conifer/deciduous<br>broad-leaved<br>forest | 35 | 5598.22 | 0.98 |
| NSTEC04 | 30.29 | 119.44 | 299  | evergreen broad-<br>leaved forest           | 21 | 5294.63 | 0.98 |
| NSTEC05 | 29.80 | 121.79 | 231  | evergreen broad-<br>leaved forest           | 41 | 6022.80 | 0.98 |
| NSTEC06 | 27.98 | 119.14 | 294  | evergreen broad-<br>leaved forest           | 57 | 5992.46 | 0.98 |
| NSTEC07 | 26.59 | 118.05 | 239  | evergreen broad-<br>leaved forest           | 59 | 6345.35 | 0.98 |
| NSTEC08 | 24.41 | 116.34 | 195  | evergreen broad-<br>leaved forest           | 35 | 7143.63 | 0.99 |
| NSTEC09 | 23.17 | 112.54 | 240  | evergreen broad-<br>leaved forest           | 45 | 7532.60 | 0.99 |
| NSTEC10 | 25.32 | 110.25 | 199  | conifer/deciduous<br>broad-leaved<br>forest | 29 | 6635.23 | 0.99 |
| NSTEC11 | 26.84 | 109.60 | 390  | conifer/deciduous<br>broad-leaved<br>forest | 53 | 5697.20 | 0.99 |
| NSTEC12 | 28.34 | 109.73 | 220  | conifer/deciduous<br>broad-leaved<br>forest | 39 | 5457.14 | 0.99 |
| NSTEC13 | 33.50 | 111.49 | 449  | deciduous broad-<br>leaved forest           | 27 | 4098.36 | 0.97 |
| NSTEC14 | 39.95 | 115.42 | 1253 | deciduous broad-<br>leaved forest           | 14 | 2357.31 | 0.81 |
| X01     | 48.19 | 87.02  | 272  | desert                                      | 8  | 2252.67 | 0.33 |
| X02     | 46.40 | 85.95  | 701  | desert                                      | 18 | 3575.09 | 0.23 |

---

|     |       |       |      |                             |    |         |      |
|-----|-------|-------|------|-----------------------------|----|---------|------|
| X03 | 47.04 | 87.09 | 620  | desert steppe               | 10 | 2930.53 | 0.31 |
| X04 | 47.83 | 86.85 | 499  | desert steppe               | 20 | 3118.13 | 0.29 |
| X05 | 47.94 | 86.83 | 481  | desert                      | 11 | 3105.78 | 0.29 |
| X06 | 48.17 | 87.08 | 709  | desert steppe               | 15 | 2252.67 | 0.33 |
| X07 | 48.11 | 87.01 | 1100 | shrubland                   | 6  | 2252.67 | 0.33 |
| X08 | 48.33 | 87.12 | 1595 | meadow                      | 13 | 1304.34 | 0.57 |
| X09 | 47.72 | 87.02 | 498  | desert steppe               | 23 | 3165.82 | 0.28 |
| X10 | 47.74 | 87.54 | 521  | desert steppe               | 13 | 3146.09 | 0.27 |
| X11 | 47.16 | 88.70 | 750  | desert                      | 8  | 3159.38 | 0.3  |
| X12 | 46.30 | 89.55 | 885  | desert                      | 10 | 3021.81 | 0.32 |
| X13 | 45.36 | 89.40 | 1068 | desert                      | 7  | 2929.95 | 0.33 |
| X14 | 44.12 | 87.81 | 513  | desert                      | 11 | 3901.31 | 0.29 |
| X15 | 44.08 | 87.79 | 583  | desert steppe               | 18 | 3934.76 | 0.29 |
| X16 | 44.07 | 88.08 | 852  | desert steppe               | 11 | 3367.67 | 0.35 |
| X17 | 44.00 | 88.06 | 1060 | meadow                      | 12 | 3369.92 | 0.31 |
| X18 | 43.93 | 88.11 | 1430 | shrubland                   | 9  | 3153.82 | 0.37 |
| X19 | 42.84 | 89.44 | -91  | shrubland                   | 2  | 5745.44 | 0.09 |
| X20 | 42.73 | 89.44 | -136 | desert                      | 2  | 5869.71 | 0.14 |
| X21 | 42.69 | 89.42 | -146 | desert                      | 2  | 5989.24 | 0.08 |
| X22 | 42.37 | 88.57 | 1721 | desert                      | 5  | 3112.29 | 0.28 |
| X23 | 42.22 | 87.76 | 1445 | desert                      | 9  | 3093.93 | 0.23 |
| X24 | 41.81 | 86.25 | 1444 | desert                      | 3  | 3617.6  | 0.19 |
| X26 | 40.83 | 84.29 | 921  | desert                      | 4  | 4893.58 | 0.07 |
| X27 | 41.48 | 84.21 | 928  | desert                      | 3  | 4678.9  | 0.21 |
| X28 | 41.50 | 84.51 | 919  | desert                      | 3  | 4644.14 | 0.11 |
| X29 | 41.66 | 84.89 | 902  | desert                      | 5  | 4520.84 | 0.10 |
| X30 | 40.51 | 89.11 | 70   | desert                      | 3  | 4865.42 | 0.04 |
| X31 | 48.33 | 87.12 | 1595 | desert                      | 1  | 1304.34 | 0.57 |
| X32 | 40.83 | 84.29 | 26   | desert                      | 1  | 4893.58 | 0.07 |
| X33 | 43.93 | 88.11 | 1430 | shrubland                   | 3  | 3153.82 | 0.37 |
| X34 | 43.90 | 88.12 | 1935 | evergreen conifer<br>forest | 9  | 2037.89 | 0.70 |

---



Table S2. Species sampled at each site.

| Species                                               | Sampling sites                                                                                            |
|-------------------------------------------------------|-----------------------------------------------------------------------------------------------------------|
| <i>Abelia biflora</i>                                 | NSTEC14                                                                                                   |
| <i>Acanthopanax senticosus</i>                        | NECT05, NECT06, NECT09                                                                                    |
| <i>Acanthopanax trifoliatus</i>                       | NSTEC12                                                                                                   |
| <i>Acer buergerianum</i>                              | NSTEC03, NSTEC13                                                                                          |
| <i>Acer cinnamomifolium</i>                           | NSTEC11                                                                                                   |
| <i>Acer cordatum</i>                                  | NSTEC06                                                                                                   |
| <i>Acer ginnala</i>                                   | NECT05, NECT06                                                                                            |
| <i>Acer mandshuricum</i>                              | NECT09                                                                                                    |
| <i>Acer mono</i>                                      | NECT03, NECT06, NECT08, NECT09, NSTEC14                                                                   |
| <i>Acer tegmentosum</i>                               | NECT09                                                                                                    |
| <i>Achnatherum sibiricum</i>                          | NECT23, NECT26                                                                                            |
| <i>Acmena acuminatissima</i>                          | NSTEC09                                                                                                   |
| <i>Aconitum jaluense</i> var.<br><i>paniculigerum</i> | NECT09                                                                                                    |
| <i>Aconitum kirinense</i>                             | NECT08                                                                                                    |
| <i>Aconitum volubile</i>                              | NECT06                                                                                                    |
| <i>Acronychia pedunculata</i>                         | NSTEC09                                                                                                   |
| <i>Actaea asiatica</i>                                | NECT08                                                                                                    |
| <i>Actinidia arguta</i>                               | NECT09                                                                                                    |
| <i>Actinidia eriantha</i>                             | NSTEC07                                                                                                   |
| <i>Adenophora gmelinii</i>                            | NECT25                                                                                                    |
| <i>Adenophora stenanthina</i> var.<br><i>crispata</i> | NECT25                                                                                                    |
| <i>Adenophora tetraphylla</i>                         | NECT05, NECT06, NECT07                                                                                    |
| <i>Adiantum pedatum</i>                               | NECT09                                                                                                    |
| <i>Adina pilulifera</i>                               | NSTEC06, NSTEC07                                                                                          |
| <i>Adinandra megaphylla</i>                           | NSTEC06                                                                                                   |
| <i>Aegopodium alpestre</i>                            | NECT05, NECT06, NECT07, NECT09                                                                            |
| <i>Agrimonia pilosa</i>                               | NECT05, NECT07                                                                                            |
| <i>Agropyron cristatum</i>                            | NECT02                                                                                                    |
| <i>Agropyron michnoi</i>                              | NECT17, NECT19, NECT20, NECT21, NECT23, NECT24, NECT25, NECT26,<br>NECT27, NECT28, NECT29, NECT31, NECT33 |
| <i>Ajania achilloides</i>                             | NECT28                                                                                                    |
| <i>Akebia trifoliata</i>                              | NSTEC12                                                                                                   |
| <i>Alangium chinense</i>                              | NSTEC03                                                                                                   |
| <i>Albizia kalkora</i>                                | NSTEC02, NSTEC10, NSTEC13                                                                                 |
| <i>Alchornea trewioides</i>                           | NSTEC10                                                                                                   |
| <i>Allium bidentatum</i>                              | NECT29                                                                                                    |
| <i>Allium condensatum</i>                             | NECT23, NECT26                                                                                            |
| <i>Allium leucocephalum</i>                           | NECT29                                                                                                    |
| <i>Allium mongolicum</i>                              | NECT15, NECT18, NECT21, NECT23, NECT24, NECT25, NECT26, NECT27,<br>NECT28                                 |
| <i>Allium neriniflorum</i>                            | NECT20                                                                                                    |
| <i>Allium polyrhizum</i>                              | NECT27                                                                                                    |
| <i>Allium ramosum</i>                                 | NECT10, NECT17, NECT22, NECT23, NECT24, NECT25, NECT26, NECT27,<br>NECT28, NECT30, NECT31, NECT32, NECT33 |
| <i>Allium senescens</i>                               | NECT01, NECT11                                                                                            |
| <i>Allium</i> sp.                                     | NECT02, NECT13                                                                                            |
| <i>Allium tenuissimum</i>                             | NECT32                                                                                                    |
| <i>Alyxia vulgaris</i>                                | NSTEC07, NSTEC08                                                                                          |
| <i>Amaranthus retroflexus</i>                         | NECT12                                                                                                    |
| <i>Ampelopsis cantoniensis</i>                        | NSTEC06                                                                                                   |

|                                       |                                                                                                                |
|---------------------------------------|----------------------------------------------------------------------------------------------------------------|
| <i>Ampelopsis grossedentata</i>       | NSTEC07                                                                                                        |
| <i>Anemarrhena asphodeloides</i>      | NECT02                                                                                                         |
| <i>Angelica amurensis</i>             | NECT06                                                                                                         |
| <i>Antidesma japonicum</i>            | NSTEC06, NSTEC07, NSTEC12                                                                                      |
| <i>Aphananthe aspera</i>              | NSTEC03                                                                                                        |
| <i>Aporosa dioica</i>                 | NSTEC09                                                                                                        |
| <i>Aralia chinensis</i>               | NSTEC12                                                                                                        |
| <i>Aralia elata</i>                   | NECT09                                                                                                         |
| <i>Arctium lappa</i>                  | NECT06, NECT08                                                                                                 |
| <i>Ardisia crenata var. bicolor</i>   | NSTEC05                                                                                                        |
| <i>Ardisia hanceana</i>               | NSTEC09                                                                                                        |
| <i>Ardisia hypargyrea</i>             | NSTEC09                                                                                                        |
| <i>Ardisia japonica</i>               | NSTEC05                                                                                                        |
| <i>Ardisia lindleyana</i>             | NSTEC07, NSTEC08                                                                                               |
| <i>Ardisia punctata</i>               | NSTEC09                                                                                                        |
| <i>Arisaema heterophyllum</i>         | NECT09                                                                                                         |
| <i>Aristida adscensionis</i>          | NECT14, NECT16, NECT30                                                                                         |
| <i>Arnebia guttata</i>                | NECT18, NECT20                                                                                                 |
| <i>Artemisia anethifolia</i>          | NECT11                                                                                                         |
| <i>Artemisia annua</i>                | NECT17, NECT18                                                                                                 |
| <i>Artemisia capillaris</i>           | NSTEC13                                                                                                        |
| <i>Artemisia frigida</i>              | NECT01, NECT02, NECT15, NECT18, NECT20, NECT21, NECT22, NECT23, NECT24, NECT25, NECT26, NECT27, NECT28, NECT30 |
| <i>Artemisia keiskeana</i>            | NECT07                                                                                                         |
| <i>Artemisia lavandulaefolia</i>      | NECT10                                                                                                         |
| <i>Artemisia mongolica</i>            | NECT10, NECT17                                                                                                 |
| <i>Artemisia pubescens</i>            | NECT27                                                                                                         |
| <i>Artemisia sacrorum</i>             | NECT01, NECT02, NECT10, NECT15                                                                                 |
| <i>Artemisia sacrorum var. glauca</i> | NECT01, NECT02, NECT15                                                                                         |
| <i>Artemisia scoparia</i>             | NECT02, NECT10, NECT11, NECT12, NECT14, NECT20, NECT21, NECT22                                                 |
| <i>Artemisia sieversiana</i>          | NECT10                                                                                                         |
| <i>Artemisia sp.</i>                  | NECT02, NECT04, NECT32                                                                                         |
| <i>Artemisia sylvatica</i>            | NECT04                                                                                                         |
| <i>Asparagus brachyphyllus</i>        | NSTEC13                                                                                                        |
| <i>Asparagus dauricus</i>             | NECT04, NECT27, NECT28, NECT29, NECT30, NECT31, NECT32, NECT33                                                 |
| <i>Asparagus sp.</i>                  | NECT05, NECT08, NECT09                                                                                         |
| <i>Aster ageratoides</i>              | NECT11                                                                                                         |
| <i>Aster scaber</i>                   | NECT06, NECT07, NECT08                                                                                         |
| <i>Astilbe chinensis</i>              | NECT03, NECT05, NECT06, NECT07, NECT08, NECT09                                                                 |
| <i>Astragalus adsurgens</i>           | NECT12, NECT21, NECT26                                                                                         |
| <i>Astragalus galactites</i>          | NECT01, NECT02, NECT26                                                                                         |
| <i>Astragalus scaberrimus</i>         | NECT01, NECT02, NECT26                                                                                         |
| <i>Astragalus sp.</i>                 | NECT30                                                                                                         |
| <i>Astragalus variabilis</i>          | NECT25                                                                                                         |
| <i>Atractylodes japonica</i>          | NECT07                                                                                                         |
| <i>Atraphaxis bracteata</i>           | NECT30                                                                                                         |
| <i>Atraphaxis manshurica</i>          | NECT18                                                                                                         |
| <i>Atriplex gmelinii</i>              | NECT13                                                                                                         |
| <i>Bassia dasyphylla</i>              | NECT19                                                                                                         |
| <i>Bauhinia championii</i>            | NSTEC10                                                                                                        |
| <i>Belamcanda chinensis</i>           | NECT18                                                                                                         |
| <i>Betula albosinensis</i>            | NECT05                                                                                                         |
| <i>Betula platyphylla</i>             | NECT05, NECT06                                                                                                 |
| <i>Betula utilis</i>                  | NECT03, NECT07                                                                                                 |

|                                   |                                                                                                   |
|-----------------------------------|---------------------------------------------------------------------------------------------------|
| <i>Blastus cochinchinensis</i>    | NSTEC09                                                                                           |
| <i>Brachybotrys paridiformis</i>  | NECT06, NECT09                                                                                    |
| <i>Bromus inermis</i>             | NECT05                                                                                            |
| <i>Broussonetia papyrifera</i>    | NSTEC01                                                                                           |
| <i>Bupleurum longiradiatum</i>    | NECT07                                                                                            |
| <i>Bupleurum scorzonerifolium</i> | NECT23, NECT25, NECT26                                                                            |
| <i>Cacalia hastata</i>            | NECT05, NECT06, NECT08, NECT09                                                                    |
| <i>Calamagrostis epigejos</i>     | NECT04, NECT11                                                                                    |
| <i>Calamus hoplites</i>           | NSTEC09                                                                                           |
| <i>Callicarpa rubella</i>         | NSTEC06                                                                                           |
| <i>Camellia cordifolia</i>        | NSTEC07                                                                                           |
| <i>Camellia fraterna</i>          | NSTEC05, NSTEC06, NSTEC07                                                                         |
| <i>Camellia furfuracea</i>        | NSTEC11                                                                                           |
| <i>Camellia oleifera</i>          | NSTEC05, NSTEC11, NSTEC12                                                                         |
| <i>Camellia sinensis</i>          | NSTEC06                                                                                           |
| <i>Campanula falcata</i>          | NECT10                                                                                            |
| <i>Campanula glomerata</i>        | NECT05                                                                                            |
| <i>Canarium album</i>             | NSTEC09                                                                                           |
| <i>Caragana microphylla</i>       | NECT02, NECT16, NECT19, NECT23, NECT24, NECT25, NECT27, NECT28,<br>NECT29, NECT30, NECT31, NECT33 |
| <i>Caragana stenophylla</i>       | NECT26, NECT27, NECT28, NECT29, NECT30, NECT31, NECT33                                            |
| <i>Caragana tibetica</i>          | NECT30                                                                                            |
| <i>Cardamine macrophylla</i>      | NECT09, NECT10                                                                                    |
| <i>Carex appendiculata</i>        | NECT06                                                                                            |
| <i>Carex duriuscula</i>           | NECT10, NECT12, NECT22, NECT30                                                                    |
| <i>Carex korshinskyi</i>          | NECT21                                                                                            |
| <i>Carex meyeriana</i>            | NECT09                                                                                            |
| <i>Carex pediformis</i>           | NECT03, NECT05, NECT06                                                                            |
| <i>Carex siderosticta</i>         | NECT08, NECT09                                                                                    |
| <i>Carex sp.</i>                  | NECT04, NECT05, NECT07, NECT09                                                                    |
| <i>Carpinus cordata</i>           | NECT09                                                                                            |
| <i>Carya hunanensis</i>           | NSTEC11                                                                                           |
| <i>Caryota ochlandra</i>          | NSTEC09                                                                                           |
| <i>Castanea seguinii</i>          | NSTEC12                                                                                           |
| <i>Castanopsis carlesii</i>       | NSTEC05                                                                                           |
| <i>Castanopsis chinensis</i>      | NSTEC09                                                                                           |
| <i>Castanopsis eyrei</i>          | NSTEC04, NSTEC06, NSTEC07                                                                         |
| <i>Castanopsis fargesii</i>       | NSTEC05, NSTEC07, NSTEC08, NSTEC12                                                                |
| <i>Castanopsis fissa</i>          | NSTEC06, NSTEC07, NSTEC08, NSTEC09                                                                |
| <i>Castanopsis fordii</i>         | NSTEC07                                                                                           |
| <i>Castanopsis sclerophylla</i>   | NSTEC04, NSTEC05, NSTEC06                                                                         |
| <i>Caulophyllum robustum</i>      | NECT06, NECT07                                                                                    |
| <i>Celastrus gemmatus</i>         | NSTEC11                                                                                           |
| <i>Celastrus hindsii</i>          | NSTEC10                                                                                           |
| <i>Celastrus hypoleucus</i>       | NSTEC07                                                                                           |
| <i>Celastrus orbiculatus</i>      | NSTEC05                                                                                           |
| <i>Celtis sinensis</i>            | NSTEC03, NSTEC10, NSTEC11, NSTEC12                                                                |
| <i>Cerasus japonica</i>           | NSTEC02                                                                                           |
| <i>Ceratoides latens</i>          | NECT32, NECT33                                                                                    |
| <i>Cercis chinensis</i>           | NSTEC03                                                                                           |

|                                             |                                                                                |
|---------------------------------------------|--------------------------------------------------------------------------------|
| <i>Chenopodium acuminatum</i>               | NECT14, NECT16, NECT19, NECT27                                                 |
| <i>Chenopodium album</i>                    | NECT23, NECT24                                                                 |
| <i>Chenopodium aristatum</i>                | NECT16, NECT20, NECT24                                                         |
| <i>Chenopodium glaucum</i>                  | NECT13                                                                         |
| <i>Chloranthus japonicus</i>                | NECT06, NECT08                                                                 |
| <i>Chloris virgata</i>                      | NECT11, NECT12, NECT13, NECT19, NECT25                                         |
| <i>Choerospondias axillaris</i>             | NSTEC07                                                                        |
| <i>Chrysosplenium alternifolium</i>         | NECT06                                                                         |
| <i>Cinnamomum appelianum</i>                | NSTEC12                                                                        |
| <i>Cinnamomum camphora</i>                  | NSTEC03, NSTEC06                                                               |
| <i>Cirsium setosum</i>                      | NECT24                                                                         |
| <i>Cleistogenes songorica</i>               | NECT28, NECT30, NECT31, NECT33                                                 |
| <i>Cleistogenes squarrosa</i>               | NECT01, NECT02, NECT15, NECT16, NECT17, NECT18, NECT20, NECT21, NECT22, NECT24 |
| <i>Clematis armandii</i>                    | NSTEC11, NSTEC13                                                               |
| <i>Clematis fusca var violaceae</i>         | NECT07                                                                         |
| <i>Clematis hexapetala</i>                  | NECT10                                                                         |
| <i>Clematis sp.</i>                         | NECT03, NECT04, NECT06, NECT09                                                 |
| <i>Clematis terniflora var. mandshurica</i> | NECT10                                                                         |
| <i>Clerodendrum mandarinorum</i>            | NSTEC12                                                                        |
| <i>Clerodendrum trichotomum</i>             | NSTEC02                                                                        |
| <i>Cleyera japonica</i>                     | NSTEC05                                                                        |
| <i>Clintonia udensis</i>                    | NECT08                                                                         |
| <i>Convallaria majalis</i>                  | NECT07                                                                         |
| <i>Convolvulus ammannii</i>                 | NECT27, NECT28, NECT30, NECT31, NECT32, NECT33                                 |
| <i>Convolvulus arvensis</i>                 | NECT15, NECT20, NECT21                                                         |
| <i>Coptosapelta diffusa</i>                 | NSTEC06, NSTEC07, NSTEC08                                                      |
| <i>Coriaria nepalensis</i>                  | NSTEC13                                                                        |
| <i>Corylus heterophylla</i>                 | NECT03, NECT05, NECT06, NECT07, NECT08, NECT09, NECT10, NSTEC14                |
| <i>Cotinus coggygria</i>                    | NSTEC13                                                                        |
| <i>Crataegus pinnatifida</i>                | NECT10                                                                         |
| <i>Crataegus sp.</i>                        | NECT05                                                                         |
| <i>Croton tiglium</i>                       | NSTEC10                                                                        |
| <i>Cryptocarya chinensis</i>                | NSTEC09                                                                        |
| <i>Cryptocarya concinna</i>                 | NSTEC09                                                                        |
| <i>Cryptomeria fortunei</i>                 | NSTEC06                                                                        |
| <i>Cudrania cochinchinensis</i>             | NSTEC10                                                                        |
| <i>Cudrania tricuspidata</i>                | NSTEC03                                                                        |
| <i>Cunninghamia lanceolata</i>              | NSTEC04, NSTEC06, NSTEC12                                                      |
| <i>Cuscuta chinensis</i>                    | NECT16                                                                         |
| <i>Cyclobalanopsis gilva</i>                | NSTEC05                                                                        |
| <i>Cyclobalanopsis glauca</i>               | NSTEC04, NSTEC05, NSTEC06, NSTEC07, NSTEC10, NSTEC11, NSTEC12                  |
| <i>Cyclobalanopsis gracilis</i>             | NSTEC05                                                                        |
| <i>Cyclobalanopsis stewardiana</i>          | NSTEC05                                                                        |
| <i>Cymbaria dahurica</i>                    | NECT23, NECT26, NECT27                                                         |
| <i>Cynanchum sibiricum</i>                  | NECT18, NECT19                                                                 |
| <i>Cynanchum thesioides</i>                 | NECT02                                                                         |
| <i>Dalbergia hancei</i>                     | NSTEC11                                                                        |
| <i>Dalbergia hupeana</i>                    | NSTEC02, NSTEC04, NSTEC10, NSTEC13                                             |
| <i>Dalbergia mimosoides</i>                 | NSTEC05                                                                        |

|                                                     |                                                 |
|-----------------------------------------------------|-------------------------------------------------|
| <i>Damnacanthus indicus</i>                         | NSTEC05                                         |
| <i>Daphniphyllum oldhamii</i>                       | NSTEC07, NSTEC08, NSTEC11                       |
| <i>Dasymaschalon rostratum</i>                      | NSTEC09                                         |
| <i>Decaspermum fruticosum</i>                       | NSTEC10                                         |
| <i>Delphinium grandiflorum</i>                      | NECT02, NECT18                                  |
| <i>Dendrotrophe frutescens</i>                      | NSTEC08                                         |
| <i>Desmodium fallax</i> var.<br><i>mandshuricum</i> | NECT09                                          |
| <i>Dianthus chinensis</i>                           | NECT18, NECT20, NECT21                          |
| <i>Dichroa febrifuga</i>                            | NSTEC11                                         |
| <i>Dioscorea cirrhosa</i>                           | NSTEC05                                         |
| <i>Dioscorea nipponica</i>                          | NECT03, NECT04, NECT05, NECT06, NECT09          |
| <i>Dioscorea opposita</i>                           | NSTEC05                                         |
| <i>Diospyros cathayensis</i>                        | NSTEC12                                         |
| <i>Diospyros eriantha</i>                           | NSTEC09                                         |
| <i>Diospyros kaki</i> var. <i>sylvestris</i>        | NSTEC07, NSTEC12                                |
| <i>Diospyros lotus</i>                              | NSTEC04, NSTEC13                                |
| <i>Diospyros miaoshanica</i>                        | NSTEC11                                         |
| <i>Diospyros morrisiana</i>                         | NSTEC08                                         |
| <i>Diospyros tutcheri</i>                           | NSTEC08                                         |
| <i>Diploclisia glaucescens</i>                      | NSTEC07                                         |
| <i>Dischidia chinensis</i>                          | NSTEC09                                         |
| <i>Distylium myricoides</i>                         | NSTEC06                                         |
| <i>Dontostemon integrifolius</i>                    | NECT20, NECT21                                  |
| <i>Dracocephalum argunense</i>                      | NECT07                                          |
| <i>Dryopteris crassirhizoma</i>                     | NECT09                                          |
| <i>Echinochloa crusgalli</i>                        | NECT10, NECT11, NECT12                          |
| <i>Echinops gmelinii</i>                            | NECT16, NECT19, NECT24                          |
| <i>Echinops</i> sp.                                 | NECT02                                          |
| <i>Elaeagnus henryi</i>                             | NSTEC12                                         |
| <i>Elaeocarpus glabripetalus</i>                    | NSTEC08                                         |
| <i>Elaeocarpus japonicus</i>                        | NSTEC05, NSTEC06, NSTEC07                       |
| <i>Embelia rudis</i>                                | NSTEC06, NSTEC07                                |
| <i>Engelhardtia roxburghiana</i>                    | NSTEC08                                         |
| <i>Ephedra distachya</i>                            | NECT17                                          |
| <i>Ephedra sinica</i>                               | NECT26                                          |
| <i>Equisetum arvense</i>                            | NECT06                                          |
| <i>Equisetum hyemale</i>                            | NECT05, NECT06                                  |
| <i>Eragrostis cilianensis</i>                       | NECT16                                          |
| <i>Eragrostis minor</i>                             | NECT12, NECT14, NECT30, NECT31                  |
| <i>Erodium stephanianum</i>                         | NECT02, NECT13                                  |
| <i>Erycibe obtusifolia</i>                          | NSTEC09                                         |
| <i>Erythrophleum fordii</i>                         | NSTEC09                                         |
| <i>Euonymus alatus</i>                              | NECT03, NECT05, NECT06, NECT08, NECT09, NSTEC03 |
| <i>Euonymus dielsianus</i>                          | NSTEC11                                         |
| <i>Euonymus pauciflorus</i>                         | NECT07, NECT09                                  |
| <i>Euphorbia esula</i>                              | NECT01, NECT02, NECT20                          |
| <i>Euphorbia humifusa</i>                           | NECT01, NECT02, NECT31                          |
| <i>Euphorbia humifusa</i> var. <i>pilosa</i>        | NECT16                                          |
| <i>Euphorbia lucorum</i>                            | NECT07                                          |

|                                          |                                        |
|------------------------------------------|----------------------------------------|
| <i>Euphorbia mandshurica</i>             | NECT10                                 |
| <i>Eurya alata</i>                       | NSTEC12                                |
| <i>Eurya loquaiana</i>                   | NSTEC11                                |
| <i>Eurya nitida</i>                      | NSTEC07                                |
| <i>Eurya rubiginosa</i>                  | NSTEC05                                |
| <i>Eurya rubiginosa var. attenuata</i>   | NSTEC04                                |
| <i>Euscaphis japonica</i>                | NSTEC06                                |
| <i>Evodia fargesii</i>                   | NSTEC08                                |
| <i>Evodia lepta</i>                      | NSTEC08                                |
| <i>Ferula bungeana</i>                   | NECT16, NECT30, NECT31, NECT33         |
| <i>Festuca dahurica</i>                  | NECT29                                 |
| <i>Ficus fulva</i>                       | NSTEC07, NSTEC08                       |
| <i>Ficus henryi</i>                      | NSTEC11                                |
| <i>Ficus heteromorpha</i>                | NSTEC12                                |
| <i>Ficus pandurata</i>                   | NSTEC06                                |
| <i>Ficus pandurata var. angustifolia</i> | NSTEC12                                |
| <i>Ficus pumila</i>                      | NSTEC06                                |
| <i>Ficus sarmentosa var. henryi</i>      | NSTEC12                                |
| <i>Ficus variolosa</i>                   | NSTEC10                                |
| <i>Ficus wightiana</i>                   | NSTEC09                                |
| <i>Filifolium sibiricum</i>              | NECT21                                 |
| <i>Firmiana platanifolia</i>             | NSTEC03, NSTEC10                       |
| <i>Fissistigma glaucescens</i>           | NSTEC09                                |
| <i>Fissistigma oldhamii</i>              | NSTEC07                                |
| <i>Fordia cauliflora</i>                 | NSTEC10                                |
| <i>Fragaria orientalis</i>               | NECT08, NECT09                         |
| <i>Fraxinus bungeana</i>                 | NSTEC14                                |
| <i>Fraxinus mandshurica</i>              | NECT05, NECT06                         |
| <i>Fraxinus rhynchophylla</i>            | NECT03, NECT04, NECT05, NECT06, NECT08 |
| <i>Galium manshuricum</i>                | NECT08                                 |
| <i>Galium verum</i>                      | NECT23                                 |
| <i>Garcinia oblongifolia</i>             | NSTEC09                                |
| <i>Gardenia jasminoides</i>              | NSTEC04, NSTEC07, NSTEC08, NSTEC11     |
| <i>Gentiana dahurica</i>                 | NECT25                                 |
| <i>Geranium sp.</i>                      | NECT08                                 |
| <i>Geranium transbaicalicum</i>          | NECT18, NECT20                         |
| <i>Geum sp.</i>                          | NECT05                                 |
| <i>Gironniera subaequalis</i>            | NSTEC09                                |
| <i>Glochidion eriocarpum</i>             | NSTEC08                                |
| <i>Glochidion puberum</i>                | NSTEC02, NSTEC03                       |
| <i>Glycine soja</i>                      | NECT09                                 |
| <i>Glycyrrhiza uralensis</i>             | NECT02, NECT23, NECT26                 |
| <i>Gnetum montanum</i>                   | NSTEC09                                |
| <i>Gnetum parvifolium</i>                | NSTEC07                                |
| <i>Grewia biloba</i>                     | NSTEC01, NSTEC10                       |
| <i>Haplophyllum dauricum</i>             | NECT02, NECT26, NECT30, NECT31, NECT32 |
| <i>Haplophyllum tragacanthoides</i>      | NECT32                                 |
| <i>Hedysarum fruticosum</i>              | NECT15, NECT17                         |

|                                              |                                                                                                |
|----------------------------------------------|------------------------------------------------------------------------------------------------|
| <i>Helicia cochinchinensis</i>               | NSTEC07                                                                                        |
| <i>Hemerocallis middendorffii</i>            | NECT03, NECT04                                                                                 |
| <i>Heteropappus altaicus</i>                 | NECT02, NECT10, NECT15, NECT20, NECT22, NECT23, NECT24, NECT25, NECT26, NECT27                 |
| <i>Hieracium denticulata</i>                 | NECT12                                                                                         |
| <i>Hieracium denticuliferum</i>              | NECT10                                                                                         |
| <i>Hippolytia trifida</i>                    | NECT30, NECT31, NECT32, NECT33                                                                 |
| <i>Hovenia acerba</i>                        | NSTEC11                                                                                        |
| <i>Ilex asprella</i>                         | NSTEC08                                                                                        |
| <i>Ilex cornuta</i>                          | NSTEC03                                                                                        |
| <i>Ilex hylonoma</i>                         | NSTEC10                                                                                        |
| <i>Ilex pubescens</i>                        | NSTEC06, NSTEC07, NSTEC08                                                                      |
| <i>Ilex purpurea</i>                         | NSTEC04, NSTEC11                                                                               |
| <i>Ilex viridis</i>                          | NSTEC07                                                                                        |
| <i>Impatiens furcillata</i>                  | NECT06, NECT09                                                                                 |
| <i>Indigofera ichangensis</i>                | NSTEC06                                                                                        |
| <i>Indocalamus tessellatus</i>               | NSTEC07                                                                                        |
| <i>Inula britannica</i>                      | NECT11, NECT12                                                                                 |
| <i>Iris lactea var. chinensis</i>            | NECT10, NECT13, NECT22, NECT25, NECT33                                                         |
| <i>Itea chinensis var. oblonga</i>           | NSTEC06, NSTEC07                                                                               |
| <i>Ixeris chinensis</i>                      | NECT04                                                                                         |
| <i>Ixeris denticulata</i>                    | NECT10, NECT12                                                                                 |
| <i>Ixora chinensis</i>                       | NSTEC09                                                                                        |
| <i>Jasminum lanceolarium</i>                 | NSTEC12                                                                                        |
| <i>Juglans mandshurica</i>                   | NECT09, NSTEC14                                                                                |
| <i>Kadsura longipedunculata</i>              | NSTEC06, NSTEC11, NSTEC12                                                                      |
| <i>Kalimeris integrifolia</i>                | NECT11                                                                                         |
| <i>Kalopanax septemlobus</i>                 | NSTEC03, NSTEC12                                                                               |
| <i>Kochia prostrata</i>                      | NECT23, NECT24, NECT27, NECT29                                                                 |
| <i>Kochia scoparia var. sieversiana</i>      | NECT12, NECT13                                                                                 |
| <i>Kummerowia striata</i>                    | NECT10, NECT12                                                                                 |
| <i>Lamium japonicum</i>                      | NECT11                                                                                         |
| <i>Larix olgensis</i>                        | NECT05, NECT07                                                                                 |
| <i>Lasianthus lancilimbus</i>                | NSTEC06, NSTEC07                                                                               |
| <i>Lathyrus davidii</i>                      | NECT04                                                                                         |
| <i>Lathyrus hedysaroides var. subsericea</i> | NECT15                                                                                         |
| <i>Laurocerasus spinulosa</i>                | NSTEC06                                                                                        |
| <i>Laurocerasus zippeliana</i>               | NSTEC11                                                                                        |
| <i>Leontopodium leontopodioides</i>          | NECT15                                                                                         |
| <i>Leonurus japonicus</i>                    | NECT20                                                                                         |
| <i>Lepidium apetalum</i>                     | NECT13                                                                                         |
| <i>Lespedeza bicolor</i>                     | NECT03, NECT05, NECT06, NECT07, NECT08, NSTEC13, NSTEC14                                       |
| <i>Lespedeza davurica</i>                    | NECT01, NECT02, NECT10, NECT15, NECT17, NECT18, NECT19, NECT20, NECT21                         |
| <i>Lespedeza formosa</i>                     | NSTEC02                                                                                        |
| <i>Lespedeza hedysaroides</i>                | NECT15, NECT20                                                                                 |
| <i>Leymus chinensis</i>                      | NECT01, NECT11, NECT12, NECT13, NECT17, NECT18, NECT20, NECT21, NECT22, NECT24, NECT25, NECT26 |
| <i>Ligustrum lucidum</i>                     | NSTEC03                                                                                        |
| <i>Ligustrum sinense</i>                     | NSTEC11                                                                                        |
| <i>Lilium lancifolium</i>                    | NECT08, NECT09                                                                                 |

|                                         |                                                                                        |
|-----------------------------------------|----------------------------------------------------------------------------------------|
| <i>Limonium aureum</i>                  | NECT32                                                                                 |
| <i>Limonium bicolor</i>                 | NECT13, NECT20, NECT26                                                                 |
| <i>Lindera aggregata</i>                | NSTEC04, NSTEC06                                                                       |
| <i>Lindera chunii</i>                   | NSTEC09                                                                                |
| <i>Lindera communis</i>                 | NSTEC11                                                                                |
| <i>Lindera glauca</i>                   | NSTEC03, NSTEC06                                                                       |
| <i>Lindera megaphylla</i>               | NSTEC11                                                                                |
| <i>Linum stelleroides</i>               | NECT10                                                                                 |
| <i>Liquidambar formosana</i>            | NSTEC03, NSTEC05, NSTEC06                                                              |
| <i>Lithocarpus glaber</i>               | NSTEC05, NSTEC06, NSTEC07, NSTEC08, NSTEC11                                            |
| <i>Litsea coreana</i>                   | NSTEC11, NSTEC12                                                                       |
| <i>Litsea coreana var. sinensis</i>     | NSTEC10                                                                                |
| <i>Litsea cubeba</i>                    | NSTEC08                                                                                |
| <i>Litsea machiloides</i>               | NSTEC08                                                                                |
| <i>Litsea wilsonii</i>                  | NSTEC06, NSTEC07, NSTEC08                                                              |
| <i>Lonicera chrysantha</i>              | NECT03, NECT05                                                                         |
| <i>Lonicera cinerea</i>                 | NSTEC06                                                                                |
| <i>Lonicera maackii</i>                 | NECT06, NECT09, NSTEC14                                                                |
| <i>Lonicera monantha</i>                | NECT09                                                                                 |
| <i>Lonicera tartarinowii</i>            | NSTEC13                                                                                |
| <i>Loropetalum chinense</i>             | NSTEC04, NSTEC05, NSTEC06, NSTEC07, NSTEC10, NSTEC12                                   |
| <i>Lychnis fulgens</i>                  | NECT06, NECT09                                                                         |
| <i>Lygodium alpestre</i>                | NECT09                                                                                 |
| <i>Lyonia ovalifolia var. elliptica</i> | NSTEC07                                                                                |
| <i>Maackia amurensis</i>                | NECT05, NECT06                                                                         |
| <i>Machilus chinensis</i>               | NSTEC09                                                                                |
| <i>Machilus pauhoi</i>                  | NSTEC11                                                                                |
| <i>Machilus thunbergii</i>              | NSTEC05                                                                                |
| <i>Macropanax rosthornii</i>            | NSTEC11                                                                                |
| <i>Maesa japonica</i>                   | NSTEC06, NSTEC11, NSTEC12                                                              |
| <i>Maesa perlaria</i>                   | NSTEC11                                                                                |
| <i>Mahonia japonica</i>                 | NSTEC12                                                                                |
| <i>Mallotus philippensis</i>            | NSTEC11                                                                                |
| <i>Matteuccia struthiopteris</i>        | NECT09                                                                                 |
| <i>Medicago lupulina</i>                | NECT16                                                                                 |
| <i>Melastoma sanguineum</i>             | NSTEC09                                                                                |
| <i>Melilotoides ruthenica</i>           | NECT02, NECT10, NECT17, NECT18, NECT20, NECT21, NECT22, NECT24, NECT25, NECT26, NECT27 |
| <i>Melilotus suaveolens</i>             | NECT11                                                                                 |
| <i>Meliosma cuneifolia</i>              | NSTEC09                                                                                |
| <i>Memecylon ligustrifolium</i>         | NSTEC09                                                                                |
| <i>Messerschmidia sibirica</i>          | NECT13                                                                                 |
| <i>Metaplexis japonica</i>              | NECT13                                                                                 |
| <i>Microdesmis caseariifolia</i>        | NSTEC09                                                                                |
| <i>Millettia dielsiana</i>              | NSTEC07, NSTEC10, NSTEC11                                                              |
| <i>Millettia reticulata</i>             | NSTEC06, NSTEC10                                                                       |
| <i>Monotropa hypopitys</i>              | NECT08                                                                                 |
| <i>Morinda umbellata</i>                | NSTEC05, NSTEC06                                                                       |
| <i>Mukdenia rossii</i>                  | NECT05                                                                                 |
| <i>Mussaenda erosa</i>                  | NSTEC08                                                                                |



|                                           |                                           |
|-------------------------------------------|-------------------------------------------|
| <i>Mussaenda esquirolii</i>               | NSTEC12                                   |
| <i>Mussaenda pubescens</i>                | NSTEC07                                   |
| <i>Myrica rubra</i>                       | NSTEC05                                   |
| <i>Neolitsea aurata var zhejinagensis</i> | NSTEC05                                   |
| <i>Onoclea sensibilis</i>                 | NECT05                                    |
| <i>Oreocnide frutescens</i>               | NSTEC06                                   |
| <i>Ormosia glaberrima</i>                 | NSTEC09                                   |
| <i>Ormosia henryi</i>                     | NSTEC05                                   |
| <i>Orostachys malacophylla</i>            | NECT23                                    |
| <i>Osmanthus cooperi</i>                  | NSTEC04                                   |
| <i>Osmanthus fragrans</i>                 | NSTEC03, NSTEC11                          |
| <i>Oxytropis myriophylla</i>              | NECT25                                    |
| <i>Oxytropis sp.</i>                      | NECT02, NECT25                            |
| <i>Paederia scandens</i>                  | NSTEC03                                   |
| <i>Paeonia japonica</i>                   | NECT06, NECT07                            |
| <i>Paris verticillata</i>                 | NECT08                                    |
| <i>Parthenocissus laetevirens</i>         | NSTEC11                                   |
| <i>Parthenocissus tricuspidata</i>        | NSTEC03                                   |
| <i>Patrinia rupestris</i>                 | NECT15                                    |
| <i>Paulownia kawakamii</i>                | NSTEC07                                   |
| <i>Peganum harmala</i>                    | NECT28, NECT33                            |
| <i>Pennisetum flaccidum</i>               | NECT15, NECT16, NECT17, NECT18, NECT20    |
| <i>Pericampylus glaucus</i>               | NSTEC06, NSTEC07                          |
| <i>Periploca sepium</i>                   | NSTEC13                                   |
| <i>Peucedanum terebinthaceum</i>          | NECT07                                    |
| <i>Phellodendron amurense</i>             | NECT05, NECT06                            |
| <i>Philadelphus tenuifolius</i>           | NECT03, NECT07, NECT08, NECT09            |
| <i>Phlomis maximowiczii</i>               | NECT04, NECT06, NECT09                    |
| <i>Phlomis tuberosa</i>                   | NECT25                                    |
| <i>Phoebe hunanensis</i>                  | NSTEC07                                   |
| <i>Phoebe sheareri</i>                    | NSTEC11                                   |
| <i>Photinia beauverdiana</i>              | NSTEC11                                   |
| <i>Photinia davidsoniae</i>               | NSTEC12                                   |
| <i>Photinia glabra</i>                    | NSTEC04, NSTEC08                          |
| <i>Photinia parvifolia</i>                | NSTEC07                                   |
| <i>Photinia serrulata</i>                 | NSTEC07                                   |
| <i>Phragmites australis</i>               | NECT05, NECT11, NECT13                    |
| <i>Phragmites hirsutus</i>                | NECT11                                    |
| <i>Phyllostachys heteroclada</i>          | NSTEC03                                   |
| <i>Picea sp.</i>                          | NECT07                                    |
| <i>Picrasma chinensis</i>                 | NSTEC09                                   |
| <i>Pinus koraiensis</i>                   | NECT06, NECT08, NECT09                    |
| <i>Pinus massoniana</i>                   | NSTEC03, NSTEC06, NSTEC10, NSTEC12        |
| <i>Pinus tabuliformis</i>                 | NECT04, NECT10, NSTEC01, NSTEC02, NSTEC13 |
| <i>Piper chinense</i>                     | NSTEC09                                   |
| <i>Piper hancei</i>                       | NSTEC11                                   |
| <i>Piper wallichii</i>                    | NSTEC11                                   |
| <i>Pistacia chinensis</i>                 | NSTEC03, NSTEC12, NSTEC13                 |
| <i>Pittosporum sahnianum</i>              | NSTEC06, NSTEC12                          |

|                                               |                                                                 |
|-----------------------------------------------|-----------------------------------------------------------------|
| <i>Pittosporum tobira</i>                     | NSTEC03                                                         |
| <i>Plantago depressa</i>                      | NECT12                                                          |
| <i>Platycladus orientalis</i>                 | NSTEC02, NSTEC13                                                |
| <i>Platycodon grandiflorus</i>                | NECT10, NSTEC02                                                 |
| <i>Pleioblastus amarus</i>                    | NSTEC05, NSTEC06, NSTEC07                                       |
| <i>Poa angustifolia</i>                       | NECT24                                                          |
| <i>Podocarpium podocarpum</i>                 | NSTEC12                                                         |
| <i>Podocarpium podocarpum var. fallax</i>     | NSTEC11                                                         |
| <i>Podocarpium podocarpum var. oxyphyllum</i> | NSTEC03, NSTEC11                                                |
| <i>Polygala tenuifolia</i>                    | NECT01, NECT10                                                  |
| <i>Polygonatum oderatum</i>                   | NECT04, NECT06, NECT07                                          |
| <i>Polygonum divaricatum</i>                  | NECT17, NECT18, NECT20, NECT21, NECT23                          |
| <i>Polygonum sibiricum</i>                    | NECT11, NECT13                                                  |
| <i>Populus davidiana</i>                      | NECT03, NECT09, NECT10                                          |
| <i>Potentilla acaulis</i>                     | NECT21, NECT22, NECT24, NECT24                                  |
| <i>Potentilla bifurca</i>                     | NECT21, NECT22, NECT24                                          |
| <i>Potentilla chinensis</i>                   | NECT10, NECT12, NECT17, NECT20, NECT21, NECT24, NECT25, NECT26  |
| <i>Potentilla conferta</i>                    | NECT18                                                          |
| <i>Potentilla discolor</i>                    | NECT01                                                          |
| <i>Potentilla flagellaris</i>                 | NECT12                                                          |
| <i>Potentilla tanacetifolia</i>               | NECT02                                                          |
| <i>Premna fordii</i>                          | NSTEC06                                                         |
| <i>Prunus/Malus sp.</i>                       | NECT06                                                          |
| <i>Prunus padus</i>                           | NECT04                                                          |
| <i>Psammochloa villosa</i>                    | NECT24                                                          |
| <i>Psychotria serpens</i>                     | NSTEC09                                                         |
| <i>Pteridium aquilinum</i>                    | NECT03, NECT04, NECT05, NECT06, NECT08, NECT09                  |
| <i>Puccinella chinampoensis</i>               | NECT11                                                          |
| <i>Pueraria lobata</i>                        | NSTEC10                                                         |
| <i>Pyrus betulifolia</i>                      | NSTEC13                                                         |
| <i>Quercus acutissima</i>                     | NSTEC01, NSTEC02, NSTEC03                                       |
| <i>Quercus aliena</i>                         | NSTEC03, NSTEC12, NSTEC13                                       |
| <i>Quercus baronii</i>                        | NSTEC13                                                         |
| <i>Quercus chenii</i>                         | NSTEC13                                                         |
| <i>Quercus fabrei</i>                         | NSTEC01                                                         |
| <i>Quercus mongolica</i>                      | NECT04, NECT05, NECT06, NECT07, NECT08, NECT09, NECT10, NSTEC14 |
| <i>Quercus serrata var. brevipetiolata</i>    | NSTEC02                                                         |
| <i>Radermachera sinica</i>                    | NSTEC10                                                         |
| <i>Randia cochinchinensis</i>                 | NSTEC07, NSTEC08, NSTEC09                                       |
| <i>Ranunculus chinensis</i>                   | NECT07                                                          |
| <i>Rapanea kwangsiensis</i>                   | NSTEC10                                                         |
| <i>Raphiolepis indica</i>                     | NSTEC04                                                         |
| <i>Raphiolepis lanceolata</i>                 | NSTEC08                                                         |
| <i>Reaumuria soongarica</i>                   | NECT32                                                          |
| <i>Rhamnus leptophylla</i>                    | NSTEC12, NSTEC13, NSTEC14                                       |
| <i>Rhamnus schneideri</i>                     | NECT04, NECT07                                                  |
| <i>Rhamnus sp.</i>                            | NECT05, NECT06                                                  |
| <i>Rhaponticum uniflorum</i>                  | NECT15, NECT25, NECT26, NECT27                                  |
| <i>Rhododendron mariae</i>                    | NSTEC08                                                         |
| <i>Rhododendron mariesii</i>                  | NSTEC04                                                         |

|                                |                                                                                                |
|--------------------------------|------------------------------------------------------------------------------------------------|
| <i>Rhododendron ovatum</i>     | NSTEC04, NSTEC05                                                                               |
| <i>Rhododendron sp.</i>        | NECT07                                                                                         |
| <i>Rhodomyrtus tomentosa</i>   | NSTEC08                                                                                        |
| <i>Rhus chinensis</i>          | NSTEC13                                                                                        |
| <i>Ribes amurensis</i>         | NECT03                                                                                         |
| <i>Robinia pseudoacacia</i>    | NSTEC01                                                                                        |
| <i>Rosa cymosa</i>             | NSTEC03                                                                                        |
| <i>Rosa laevigata</i>          | NSTEC06                                                                                        |
| <i>Rosa sp.</i>                | NECT03, NECT08, NECT10                                                                         |
| <i>Rourea minor</i>            | NSTEC09                                                                                        |
| <i>Rubia cordifolia</i>        | NECT09                                                                                         |
| <i>Rubia sp.</i>               | NECT06, NECT08                                                                                 |
| <i>Rubia sylvatica</i>         | NECT04, NECT05, NECT09                                                                         |
| <i>Rubus columellaris</i>      | NSTEC07                                                                                        |
| <i>Rubus corchorifolius</i>    | NSTEC06, NSTEC07                                                                               |
| <i>Rubus ichangensis</i>       | NSTEC11                                                                                        |
| <i>Rubus irenaeus</i>          | NSTEC11                                                                                        |
| <i>Rubus malifolius</i>        | NSTEC11                                                                                        |
| <i>Rubus parvifolius</i>       | NSTEC03                                                                                        |
| <i>Rubus sp.</i>               | NECT08                                                                                         |
| <i>Rubus xanthocarpus</i>      | NSTEC14                                                                                        |
| <i>Sabia swinhoei</i>          | NSTEC06, NSTEC11                                                                               |
| <i>Sabina chinensis</i>        | NSTEC03                                                                                        |
| <i>Sageretia henryi</i>        | NSTEC11, NSTEC12                                                                               |
| <i>Sageretia thea</i>          | NSTEC06, NSTEC13                                                                               |
| <i>Salix gordejewii</i>        | NECT16                                                                                         |
| <i>Salix gracilistyla</i>      | NECT05                                                                                         |
| <i>Salix viminalis</i>         | NECT05                                                                                         |
| <i>Salsola collina</i>         | NECT13, NECT15, NECT18, NECT19, NECT20, NECT22, NECT27, NECT28, NECT29, NECT30, NECT31, NECT33 |
| <i>Salsola passerina</i>       | NECT32                                                                                         |
| <i>Salsola ruthenica</i>       | NECT16                                                                                         |
| <i>Sambucus sp.</i>            | NECT08                                                                                         |
| <i>Sanguisorba officinalis</i> | NECT11                                                                                         |
| <i>Sanicula chinensis</i>      | NECT09                                                                                         |
| <i>Sapium discolor</i>         | NSTEC08                                                                                        |
| <i>Sapium rotundifolium</i>    | NSTEC10                                                                                        |
| <i>Sarcandra glabra</i>        | NSTEC07, NSTEC09                                                                               |
| <i>Sarcosperma arboreum</i>    | NSTEC09                                                                                        |
| <i>Saussurea japonica</i>      | NECT02                                                                                         |
| <i>Saussurea parviflora</i>    | NECT02                                                                                         |
| <i>Schefflera octophylla</i>   | NSTEC08                                                                                        |
| <i>Schima remotiserrata</i>    | NSTEC08                                                                                        |
| <i>Schima superba</i>          | NSTEC04, NSTEC05, NSTEC09                                                                      |
| <i>Schizonepeta multifida</i>  | NECT23                                                                                         |
| <i>Scorzonera divaricata</i>   | NECT28, NECT29, NECT30, NECT31, NECT32                                                         |
| <i>Scorzonera muriculata</i>   | NECT32                                                                                         |
| <i>Scutellaria baicalensis</i> | NECT01, NECT02, NECT18                                                                         |
| <i>Scutellaria scordifolia</i> | NECT02                                                                                         |
| <i>Scutellaria sp.</i>         | NECT07                                                                                         |

|                                      |                                                                                |
|--------------------------------------|--------------------------------------------------------------------------------|
| <i>Scutellaria viscidula</i>         | NECT19                                                                         |
| <i>Securinega suffruticosa</i>       | NECT04, NECT10                                                                 |
| <i>Sedum aizoon</i>                  | NECT07, NECT09                                                                 |
| <i>Serissa serissoides</i>           | NSTEC03, NSTEC11, NSTEC12                                                      |
| <i>Serratula glauca</i>              | NECT18                                                                         |
| <i>Serratula yamatsutana</i>         | NECT02, NECT15, NECT21, NECT23, NECT25, NECT26                                 |
| <i>Sesamum indicum</i>               | NECT02                                                                         |
| <i>Setaria viridis</i>               | NECT10, NECT13, NECT14, NECT15, NECT16, NECT19, NECT26, NECT33                 |
| <i>Setaria viridis var. depressa</i> | NECT30, NECT31                                                                 |
| <i>Siler divaricatum</i>             | NECT18, NECT26                                                                 |
| <i>Siphonostegia chinensis</i>       | NECT10, NECT10                                                                 |
| <i>Sloanea sinensis</i>              | NSTEC07                                                                        |
| <i>Smilax biumbellata</i>            | NSTEC10                                                                        |
| <i>Smilax china</i>                  | NSTEC04, NSTEC05, NSTEC08                                                      |
| <i>Smilax glabra</i>                 | NSTEC06                                                                        |
| <i>Smilax glaucochina</i>            | NSTEC03                                                                        |
| <i>Smilax hypoglauca</i>             | NSTEC09, NSTEC13                                                               |
| <i>Smilax lanceifolia</i>            | NSTEC07                                                                        |
| <i>Smilax polycolea</i>              | NSTEC11                                                                        |
| <i>Sonchus brachyotus</i>            | NECT10                                                                         |
| <i>Sophora flavescens</i>            | NECT18                                                                         |
| <i>Sorbaria sorbifolia</i>           | NECT05, NECT06                                                                 |
| <i>Spiraea pubescens</i>             | NSTEC14                                                                        |
| <i>Spiraea trilobata</i>             | NECT23, NSTEC01                                                                |
| <i>Stauntonia chinensis</i>          | NSTEC05                                                                        |
| <i>Stellaria chamaejasme</i>         | NECT02, NECT23                                                                 |
| <i>Sterculia lanceolata</i>          | NSTEC09                                                                        |
| <i>Stipa glareosa</i>                | NECT29                                                                         |
| <i>Stipa gobica</i>                  | NECT30, NECT31, NECT32, NECT33                                                 |
| <i>Stipa grandis</i>                 | NECT21                                                                         |
| <i>Stipa krylovii</i>                | NECT01, NECT02, NECT15, NECT22, NECT23, NECT24, NECT25, NECT26, NECT27, NECT28 |
| <i>Streptopus sp.</i>                | NECT09                                                                         |
| <i>Streptopus streptopoides</i>      | NECT03                                                                         |
| <i>Styrax calvescens</i>             | NSTEC07                                                                        |
| <i>Styrax japonicus</i>              | NSTEC05                                                                        |
| <i>Styrax obassis</i>                | NSTEC06                                                                        |
| <i>Styrax odoratissima</i>           | NSTEC07, NSTEC10                                                               |
| <i>Suaeda glauca</i>                 | NECT11, NECT13                                                                 |
| <i>Swainsona salsula</i>             | NECT13                                                                         |
| <i>Swida bretschnideri</i>           | NSTEC14                                                                        |
| <i>Swida wilsoniana</i>              | NSTEC12                                                                        |
| <i>Symplocos heishanensis</i>        | NSTEC05                                                                        |
| <i>Symplocos lancilimba</i>          | NSTEC05                                                                        |
| <i>Symplocos laurina</i>             | NSTEC11                                                                        |
| <i>Symplocos paniculata</i>          | NSTEC03                                                                        |
| <i>Symplocos stellaris</i>           | NSTEC05                                                                        |
| <i>Symplocos sumuntia</i>            | NSTEC04, NSTEC05, NSTEC07                                                      |
| <i>Syneilesis aconitifolia</i>       | NECT04, NECT07                                                                 |
| <i>Synurus deltoides</i>             | NECT07                                                                         |

|                                                     |                                                                         |
|-----------------------------------------------------|-------------------------------------------------------------------------|
| <i>Syzygium austrosinense</i>                       | NSTEC07, NSTEC08                                                        |
| <i>Taraxacum mongolicum</i>                         | NECT02                                                                  |
| <i>Taraxacum ohwianum</i>                           | NECT12, NECT13                                                          |
| <i>Tarenna attenuata</i>                            | NSTEC08                                                                 |
| <i>Tarenna mollissima</i>                           | NSTEC06, NSTEC07                                                        |
| <i>Tarennoidea wallichii</i>                        | NSTEC07                                                                 |
| <i>Tetracera asiatica</i>                           | NSTEC09                                                                 |
| <i>Tetrastigma hemsleyanum</i>                      | NSTEC09                                                                 |
| <i>Tetrastigma planicaule</i>                       | NSTEC09                                                                 |
| <i>Tetrastigma wulinshanense</i>                    | NSTEC11                                                                 |
| <i>Thalictrum simplex</i>                           | NECT11                                                                  |
| <i>Thalictrum sp.</i>                               | NECT01, NECT08, NECT09, NECT10, NECT26                                  |
| <i>Thalictrum squarrosum</i>                        | NECT15, NECT16, NECT18, NECT21                                          |
| <i>Thalictrum squarrosum var. supradecompositum</i> | NECT02, NECT25                                                          |
| <i>Thalictrum tuberiferum</i>                       | NECT03, NECT04, NECT05, NECT06                                          |
| <i>Thalictrum squarrosum</i>                        | NECT26                                                                  |
| <i>Thermopsis lanceolata</i>                        | NECT13, NECT23                                                          |
| <i>Thymus mongolicus</i>                            | NECT01, NECT02                                                          |
| <i>Tilia amurensis</i>                              | NECT03, NECT05, NECT07                                                  |
| <i>Tilia mandshurica</i>                            | NECT03, NECT06, NECT07, NECT08, NECT09                                  |
| <i>Tilia paucicostata</i>                           | NSTEC14                                                                 |
| <i>Toxicodendron succedaneum</i>                    | NSTEC06, NSTEC07, NSTEC08                                               |
| <i>Toxicodendron sylvestre</i>                      | NSTEC11, NSTEC12                                                        |
| <i>Trachelospermum axillare</i>                     | NSTEC06                                                                 |
| <i>Trachelospermum jasminoides</i>                  | NSTEC03, NSTEC05, NSTEC10, NSTEC11                                      |
| <i>Tragus racemosus</i>                             | NECT02, NECT14, NECT16                                                  |
| <i>Tribulus terrestris</i>                          | NECT02, NECT14, NECT16, NECT19, NECT30, NECT33                          |
| <i>Trifolium lupinaster</i>                         | NECT07                                                                  |
| <i>Tripolium vulgare</i>                            | NECT10                                                                  |
| <i>Turpinia arguta</i>                              | NSTEC11                                                                 |
| <i>Tylophora silvestris</i>                         | NSTEC05                                                                 |
| <i>Ulmus changii</i>                                | NSTEC06                                                                 |
| <i>Ulmus davidiana var. japonica</i>                | NECT03, NECT04, NECT05, NECT06, NECT09, NECT10, NECT17, NECT21, NSTEC14 |
| <i>Ulmus macrocarpa</i>                             | NECT08                                                                  |
| <i>Ulmus parvifolia</i>                             | NSTEC03                                                                 |
| <i>Urtica angustifolia</i>                          | NECT03, NECT04                                                          |
| <i>Vaccinium bracteatum</i>                         | NSTEC06, NSTEC07                                                        |
| <i>Vaccinium mandarinorum</i>                       | NSTEC04, NSTEC05, NSTEC06                                               |
| <i>Vernicia fordii</i>                              | NSTEC03, NSTEC06, NSTEC13                                               |
| <i>Vernicia montana</i>                             | NSTEC07                                                                 |
| <i>Viburnum brachybotryum</i>                       | NSTEC11                                                                 |
| <i>Viburnum burejaeticum</i>                        | NECT09                                                                  |
| <i>Viburnum dilatatum</i>                           | NSTEC11                                                                 |
| <i>Viburnum erosum</i>                              | NSTEC05                                                                 |
| <i>Viburnum sargentii</i>                           | NECT05, NECT06, NECT09                                                  |
| <i>Vicia amoena</i>                                 | NECT04                                                                  |
| <i>Vicia unijuga</i>                                | NECT05, NECT06, NECT07, NECT08                                          |
| <i>Viola acuminata</i>                              | NECT07, NECT08, NECT09                                                  |
| <i>Viola biflora</i>                                | NECT09                                                                  |

|                                        |                                        |
|----------------------------------------|----------------------------------------|
| <i>Viola sp.</i>                       | NECT03, NECT07, NECT08, NECT10         |
| <i>Viola variegata</i>                 | NECT04                                 |
| <i>Vitex negundo</i>                   | NSTEC02, NSTEC03, NSTEC10, NSTEC13     |
| <i>Vitex negundo var. heterophylla</i> | NSTEC01                                |
| <i>Vitis amurensis</i>                 | NECT06, NECT08                         |
| <i>Vitis bryoniifolia</i>              | NSTEC13                                |
| <i>Vitis heyneana ssp. ficifolia</i>   | NSTEC01                                |
| <i>Wisteria sinensis</i>               | NSTEC04                                |
| <i>Xanthium strumarium</i>             | NECT12                                 |
| <i>Zanthoxylum echinocarpum</i>        | NSTEC12                                |
| <i>Zanthoxylum podocarpum</i>          | NSTEC10                                |
| <i>Zanthoxylum schinifolium</i>        | NSTEC02                                |
| <i>Zelkova serrata</i>                 | NSTEC13                                |
| <i>unidentified chenopod</i>           | NECT27                                 |
| <i>unidentified forb</i>               | NECT01, NECT06, NECT08, NECT10         |
| <i>unidentified geophyte</i>           | NECT02                                 |
| <i>unidentified grass</i>              | NECT01, NECT02, NECT15, NECT17, NECT21 |
| <i>unidentified ground creeper</i>     | NECT09                                 |
| <i>unidentified Scrophulariaceae</i>   | NECT02                                 |
| <i>unidentified semi-rosette forb</i>  | NECT02                                 |

Table S3: Principal components of climate data based on the country-wide, 10-km grid. Each component (axis) represents a linear combination of variables. Loadings for variables represent the contribution of each variable to the axis. Values are shown in **bold** when their magnitude > 0.5.

|                    | PC 1          | PC 2          | PC 3         |
|--------------------|---------------|---------------|--------------|
| MAT                | <b>0.883</b>  | -0.422        | 0.179        |
| GDD <sub>0</sub>   | <b>0.879</b>  | -0.411        | 0.142        |
| MTCO               | <b>0.865</b>  | -0.144        | 0.166        |
| MTWA               | <b>0.669</b>  | <b>-0.603</b> | 0.120        |
| PAR <sub>0</sub>   | <b>0.672</b>  | <b>-0.650</b> | 0.234        |
| MAP                | <b>0.903</b>  | 0.407         | 0.046        |
| $\alpha$           | <b>0.578</b>  | <b>0.744</b>  | 0.166        |
| MI                 | <b>0.768</b>  | <b>0.623</b>  | 0.030        |
| P <sub>DJF</sub>   | <b>0.876</b>  | 0.166         | -0.387       |
| P <sub>JJA</sub>   | <b>0.759</b>  | <b>0.540</b>  | 0.330        |
| Timing             | <b>-0.639</b> | 0.100         | <b>0.702</b> |
| Seasonality        | -0.752        | 0.094         | 0.384        |
| Variance explained | 60.5%         | 21.7%         | 9.0%         |
